# Supplementary material
Source: PubMed Central journal article supplement (PMC4650576)
Supplement: cr20158x1.pdf [file cr20158x1.pdf]

**A**

| sequence                           | position            | modification |
|------------------------------------|---------------------|--------------|
| IAKPNVSA <b>S</b> TQASR            | Ser85               | Phospho      |
| SLEISQS <b>Y</b> TTTQR             | Tyr370              | Phospho      |
| ST <b>T</b> PANLD <b>S</b> ESEHFFR | Thr1885,<br>Ser1891 | Phospho      |
| SLAFEEG <b>S</b> QSTTISSLSEK       | Ser1981             | Phospho      |
| Q <b>S</b> SQLEDRTTEAANR           | Ser2592             | Phospho      |

**B**

|                                             | Ser85                                         | Tyr370                                       |
|---------------------------------------------|-----------------------------------------------|----------------------------------------------|
| human ( <i>Homo sapiens</i> )               | -----S <b>A</b> STQA-SRQKKM                   | SLEISQ---S <b>Y</b> TTTQRES                  |
| chimpanzee ( <i>Pan troglodytes</i> )       | -----S <b>A</b> STQA-SRQKKM                   | SLEISQ---S <b>Y</b> TTTQRES                  |
| horse ( <i>Equus caballus</i> )             | -----S <b>A</b> STQA-GRQKKM                   | SLEISQ---S <b>Y</b> ATTQREC                  |
| dog ( <i>Canis familiaris</i> )             | -----S <b>A</b> STQA-TRQKKM                   | SLEISQ---S <b>Y</b> TTTQREF                  |
| rabbit ( <i>Oryctolagus cuniculus</i> )     | -----S <b>A</b> STQA-SRQKKM                   | SLEISQ---S <b>Y</b> TTTQRES                  |
| mouse ( <i>Mus musculus</i> )               | -----S <b>A</b> TTQS-SRQKKM                   | SVEISQ---S <b>Y</b> V-TQRES                  |
| frog ( <i>Xenopus tropicalis</i> )          | -----S-----                                   | -----S-----                                  |
| fruitfly ( <i>Drosophila melanogaster</i> ) | TQFNLEAGSQT-SGNGHF                            | -----KADEN                                   |
| yeast ( <i>Saccharomyces cerevisiae</i> )   | -----S <b>T</b> TNKL <b>S</b> LS <b>E</b> NRL | -LGITK <b>S</b> LL <b>T</b> <b>Y</b> FALNRKN |

  

|                                             | Thr1885                                                        | Ser1891                                                        | Ser1981                     |
|---------------------------------------------|----------------------------------------------------------------|----------------------------------------------------------------|-----------------------------|
| human ( <i>Homo sapiens</i> )               | TSRST <b>T</b> PANLD <b>S</b> ESEHFF                           | TSRST <b>T</b> PANLD <b>S</b> ESEHFF                           | SLAFEEG <b>S</b> QNTTISSLSE |
| chimpanzee ( <i>Pan troglodytes</i> )       | TSRST <b>T</b> PANLD <b>S</b> ESEHFF                           | TSRST <b>T</b> PANLD <b>S</b> ESEHFF                           | SLAFEEG <b>S</b> QSTTISSLSE |
| horse ( <i>Equus caballus</i> )             | TSRST <b>T</b> PANLD <b>S</b> ESEHIF                           | TSRST <b>T</b> PANLD <b>S</b> ESEHIF                           | SLTFEEG <b>S</b> QSTTISSLSE |
| dog ( <i>Canis familiaris</i> )             | TSRST <b>T</b> PANLD <b>S</b> ESEHFF                           | TSRST <b>T</b> PANLD <b>S</b> ESEHFF                           | SLTFEEA <b>S</b> QNTAISSLSE |
| rabbit ( <i>Oryctolagus cuniculus</i> )     | TSRST <b>T</b> PANLD <b>S</b> DSEHFF                           | TSRST <b>T</b> PANLD <b>S</b> DSEHFF                           | SLTFEEG <b>S</b> QNTTISSLSE |
| mouse ( <i>Mus musculus</i> )               | ASRS <b>A</b> T <b>P</b> ANS <b>D</b> S <b>E</b> SENF <b>L</b> | ASRS <b>A</b> T <b>P</b> ANS <b>D</b> S <b>E</b> SENF <b>L</b> | SPTFEEG <b>S</b> QGTTISSLSE |
| frog ( <i>Xenopus tropicalis</i> )          | -----S-----                                                    | -----S-----                                                    | -----S-----                 |
| fruitfly ( <i>Drosophila melanogaster</i> ) | ----T <b>A</b> P-----NSQ <b>E</b> IF                           | ----T <b>A</b> P-----NSQ <b>E</b> IF                           | -----S-----                 |
| yeast ( <i>Saccharomyces cerevisiae</i> )   | -----S-----                                                    | -----S-----                                                    | YLLFEEM <b>N</b> MPN-I----- |

  

|                                             | Ser2592                                                         |
|---------------------------------------------|-----------------------------------------------------------------|
| human ( <i>Homo sapiens</i> )               | ITKNVPK <b>Q</b> S <b>S</b> QLDED <b>R</b> TE                   |
| chimpanzee ( <i>Pan troglodytes</i> )       | ITKNVPK <b>Q</b> S <b>S</b> QLDED <b>R</b> TE                   |
| horse ( <i>Equus caballus</i> )             | ITKS <b>A</b> PK <b>Q</b> S <b>S</b> QLDED <b>R</b> TE          |
| dog ( <i>Canis familiaris</i> )             | ITKN <b>A</b> PK <b>Q</b> S <b>S</b> QLDED <b>R</b> TE          |
| rabbit ( <i>Oryctolagus cuniculus</i> )     | ITKN <b>A</b> PK <b>Q</b> S <b>S</b> QLDED <b>R</b> ME          |
| mouse ( <i>Mus musculus</i> )               | ITK <b>S</b> T <b>S</b> KEN <b>S</b> H <b>L</b> DED <b>R</b> TE |
| frog ( <i>Xenopus tropicalis</i> )          | LTK <b>N</b> AP <b>K</b> Q <b>I</b> <b>S</b> QLDED <b>R</b> ME  |
| fruitfly ( <i>Drosophila melanogaster</i> ) | -----N <b>T</b> ER <b>S</b> G                                   |
| yeast ( <i>Saccharomyces cerevisiae</i> )   | -----K <b>I</b> Q                                               |

C

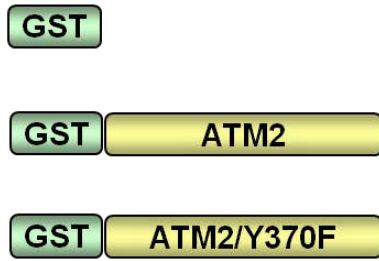

D

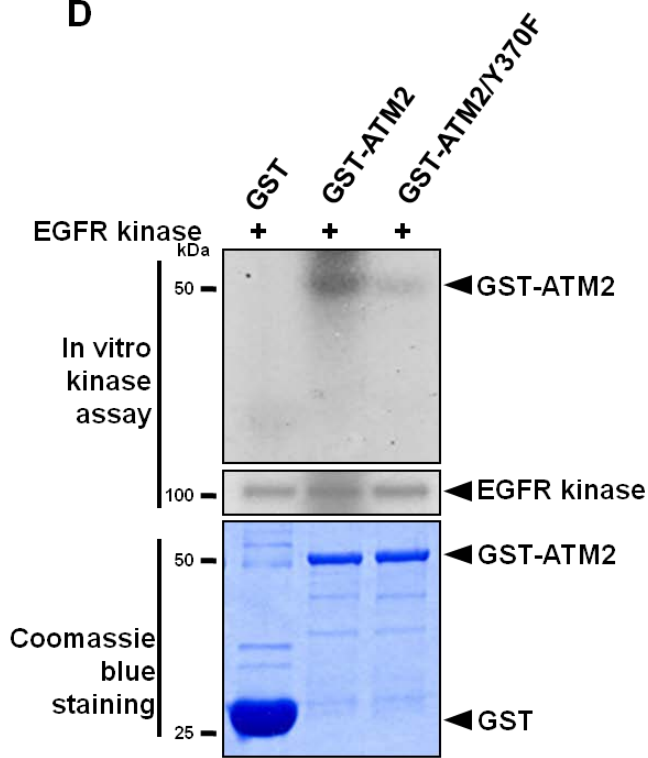

E

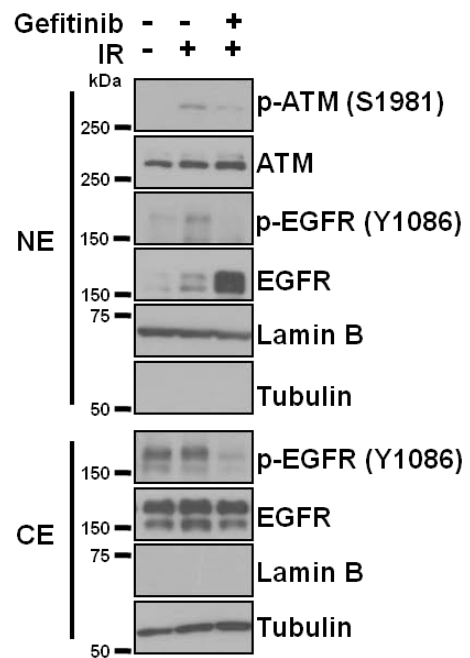

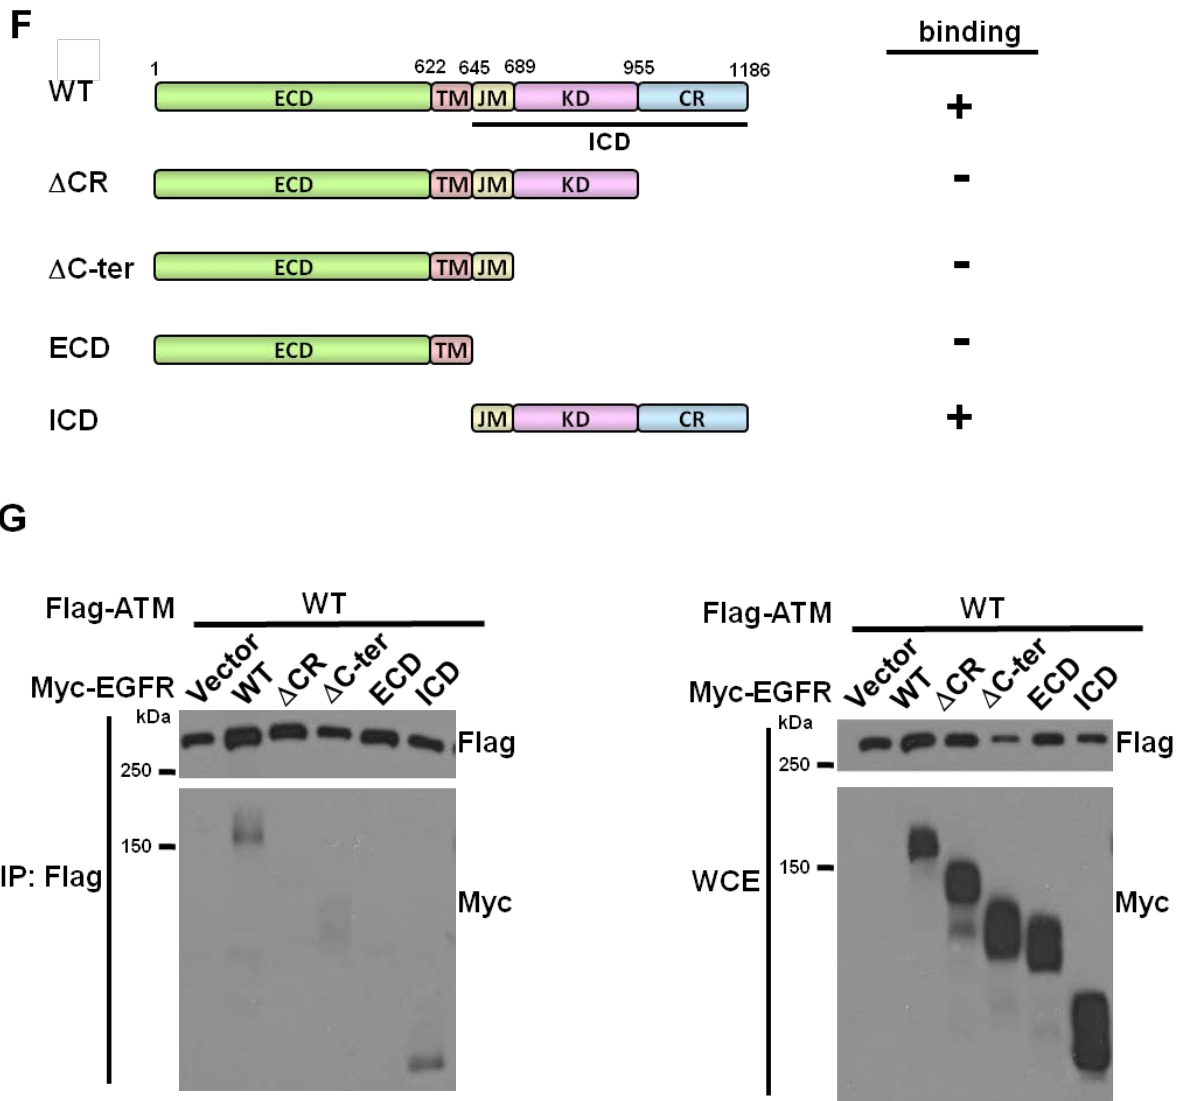

**Supplementary information, Figure S1.** ATM is tyrosine phosphorylated at residue 370. (A) Mass spectrometry analysis results of immunoprecipitated (IP) exogenous Flag-tagged ATM from HeLa cell nuclear extracts after 10 Gy IR. Sequence: ATM peptide analyzed by mass spectrometry. Position: phosphorylation residue on ATM. (B) Alignment of ATM partial sequences from human to yeast. Red Y indicates human ATM tyrosine 370 (Y370) is conserved

among all mammalian species and yeast. Frog possesses shorter form of ATM, which lacks the N-terminal region. **(C)** Schematic of GST only (GST), GST-fused ATM2 and GST-ATM2-Y370F (GST-ATM2/Y370F) constructs. ATM2 indicates ATM residues 250-522. **(D)** Recombinant GST, GST-ATM2 and GST-ATM2/Y370F proteins were incubated with purified recombinant human EGFR kinase (His672-Ala1210) *in vitro*, analyzed by SDS-PAGE, and detected by  $\gamma$ -<sup>32</sup>P exposure (kinase assay) or Coomassie brilliant blue staining. **(E)** HeLa cells were serum starved, treated with DMSO or gefitinib\*, and stimulated with or without 10 Gy IR. The resulting cells were harvested for nuclear fractionation, followed by co-immunoprecipitation assays as shown in Figure 1D and 1E. NE, nuclear extract; CE, cytosolic extract. \*Gefitinib actually significantly increases the levels of nuclear EGFR in HeLa cells, and this has been repeatedly observed. This is an interesting observation that will require further investigation. **(F)** Interactions between various EGFR domain structures and ATM. Myc-tagged EGFR wild type (WT); C-terminal regulatory region deletion ( $\Delta$ CR); C-terminal deletion ( $\Delta$ C-ter), intracellular domain deletion (ECD), and extracellular domain deletion (ICD). (+) or (-) on the right indicates positive or negative interaction, respectively. ECD: extracellular domain; TM: transmembrane; JM: juxtamembrane; KD: kinase domain; CR: C-terminal regulatory region; ICD: intracellular domain. **(G)** HEK 293T cells were transfected with plasmids as indicated and harvested for Co-IP assay followed by Western blot analysis after IR stimulation. WCE: whole cell extract.
