# Supplementary material
Source: PubMed Central journal article supplement (PMC4650576)
Supplement: cr20158x2.pdf [file cr20158x2.pdf]

**A**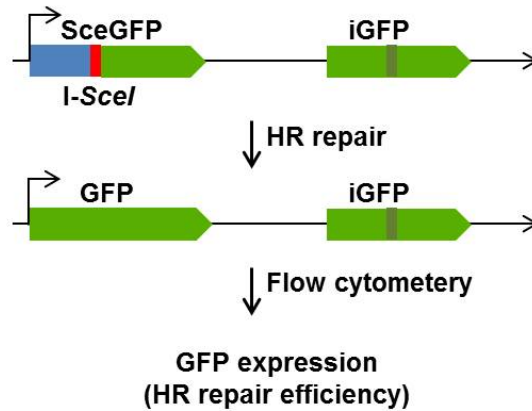**B**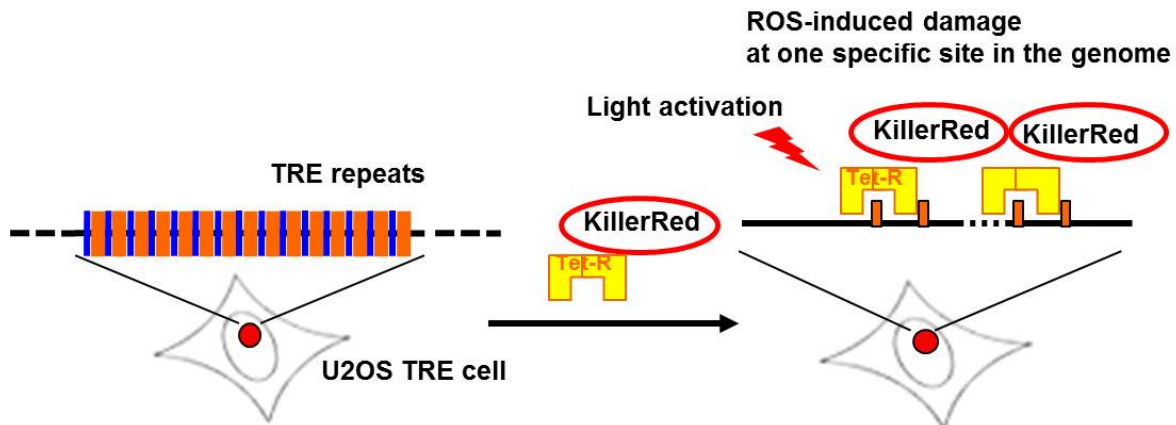

**Supplementary information, Figure S2.** Schematic of DR-GFP reporter integrated in U2OS cell and schematic of the KillerRed system in U2OS TRE cells. **(A)** Full-length GFP expression DNA was truncated by *I-SceI* restriction enzyme recognition sequence (marked as red). With exogenous *I-SceI* expression-induced DNA DSB, homologous recombination efficiency can be determined by full-length GFP expression by using flow cytometry. **(B)** KillerRed is a light-stimulated ROS-inducer fused to a tet-repressor (tetR-KR), which binds to a TRE cassette (~ 90

kb) integrated at a defined genomic locus in U2OS cells (U2OS TRE cell line)<sup>1,2</sup>. KR facilitates the formation of oxygen radicals and superoxide through the excited chromophore<sup>3,4</sup> to induce DNA damage. By targeting the expression of KR to one specific genome site, we can visualize the recruitment of proteins at genetic loci.
