# Supplementary material
Source: PubMed Central journal article supplement (PMC4650576)
Supplement: cr20158x3.pdf [file cr20158x3.pdf]

**A**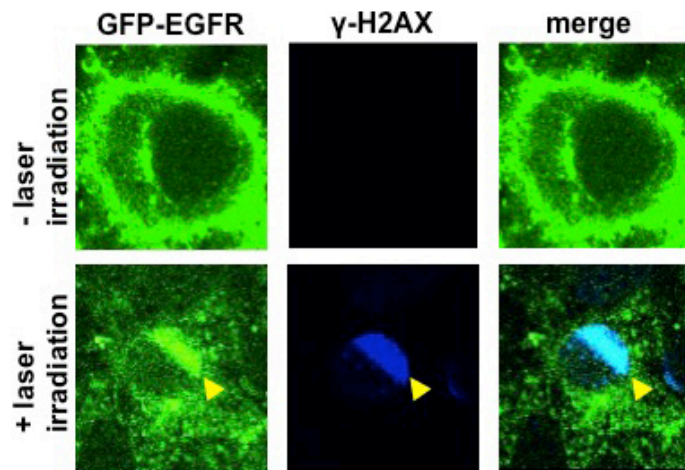**B**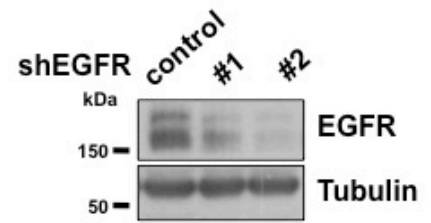**C**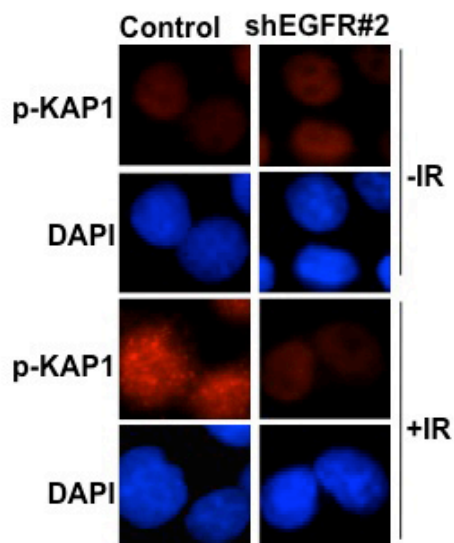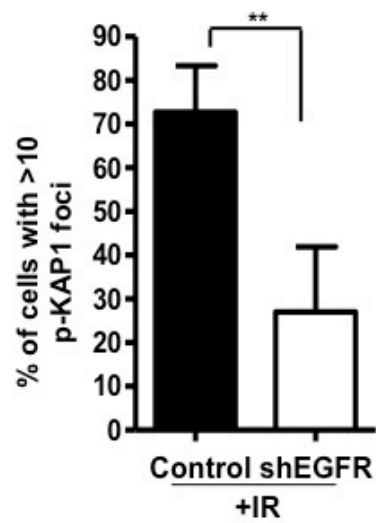

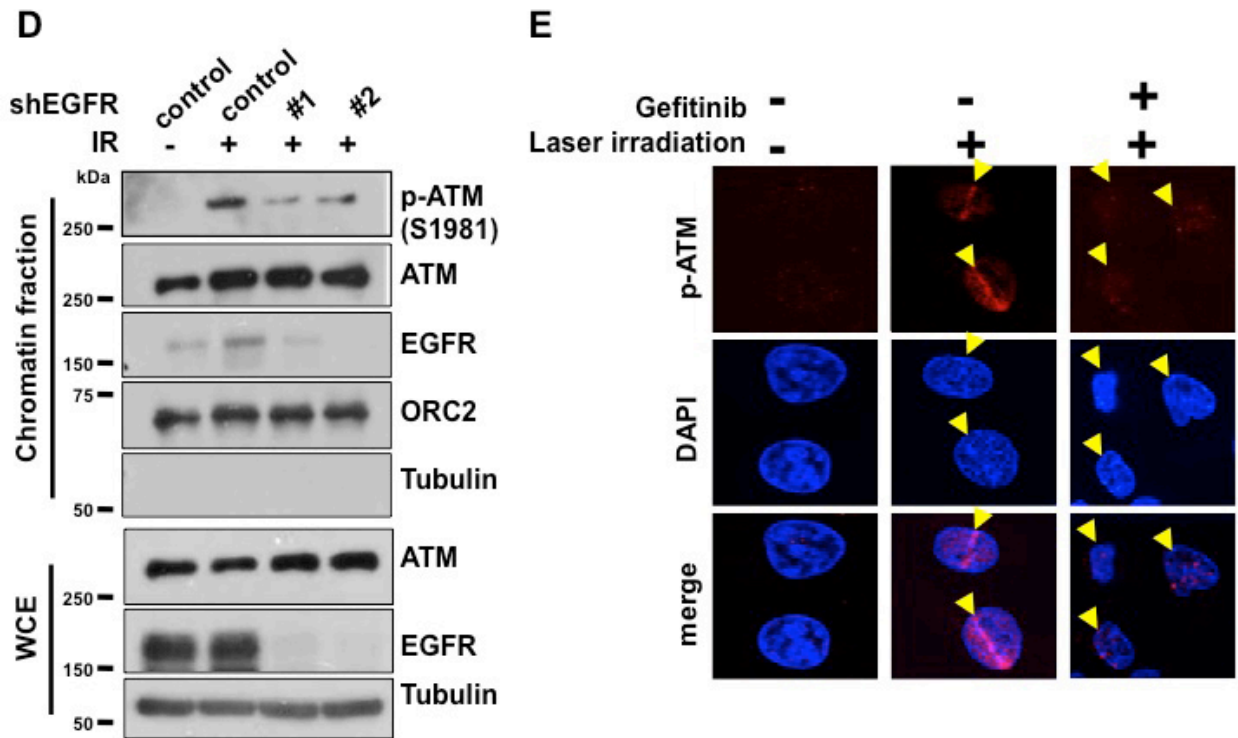

**Supplementary information, Figure S3.** EGFR co-localizes with  $\gamma$ -H2AX at laser microirradiation-induced DSBs and is required for ATM S1981 autophosphorylation upon IR stimulation. (A) GFP-EGFR transfected U2OS cells are irradiated with 405 nm for 100 ms. Fifteen minutes after irradiation, cells are fixed and stained with indicated antibody. Yellow arrowheads, laser microirradiation-induced DSBs. (B) Western blot analysis of control or two different EGFR-knockdown U2OS cells. (C) Immunofluorescent (IF) staining of irradiation-induced foci (IRIF) in control or EGFR-depleted (shEGFR) HeLa cells with the indicated antibodies. DAPI: 4,6-diamidino-2-phenylindole. Quantitation of p-KAP1 IRIF is presented as mean  $\pm$ SD.  $n = 106$ .  $*p < 0.05$ . (D) Chromatin enriched fractionation and WCE of control or EGFR-knockdown HeLa cells stimulated with or without IR. Control: shRNA vector control. #1 and #2 indicate two different clones of shEGFR. WCE: whole cell extract. ORC2: origin replication complex 2, serving as a chromatin fraction marker. Tubulin: cytosolic marker. (E)

U2OS cells are treated with or without 10  $\mu$ M Gefitinib for 16 h and irradiated with 405 nm for 100 ms. 15 min after irradiation, cells are fixed and stained with indicated antibody. DAPI: 4,6-diamidino-2-phenylindole. Yellow arrowheads, laser microirradiation-induced DSBs.
