# Supplementary material
Source: PubMed Central journal article supplement (PMC4650576)
Supplement: cr20158x5.pdf [file cr20158x5.pdf]

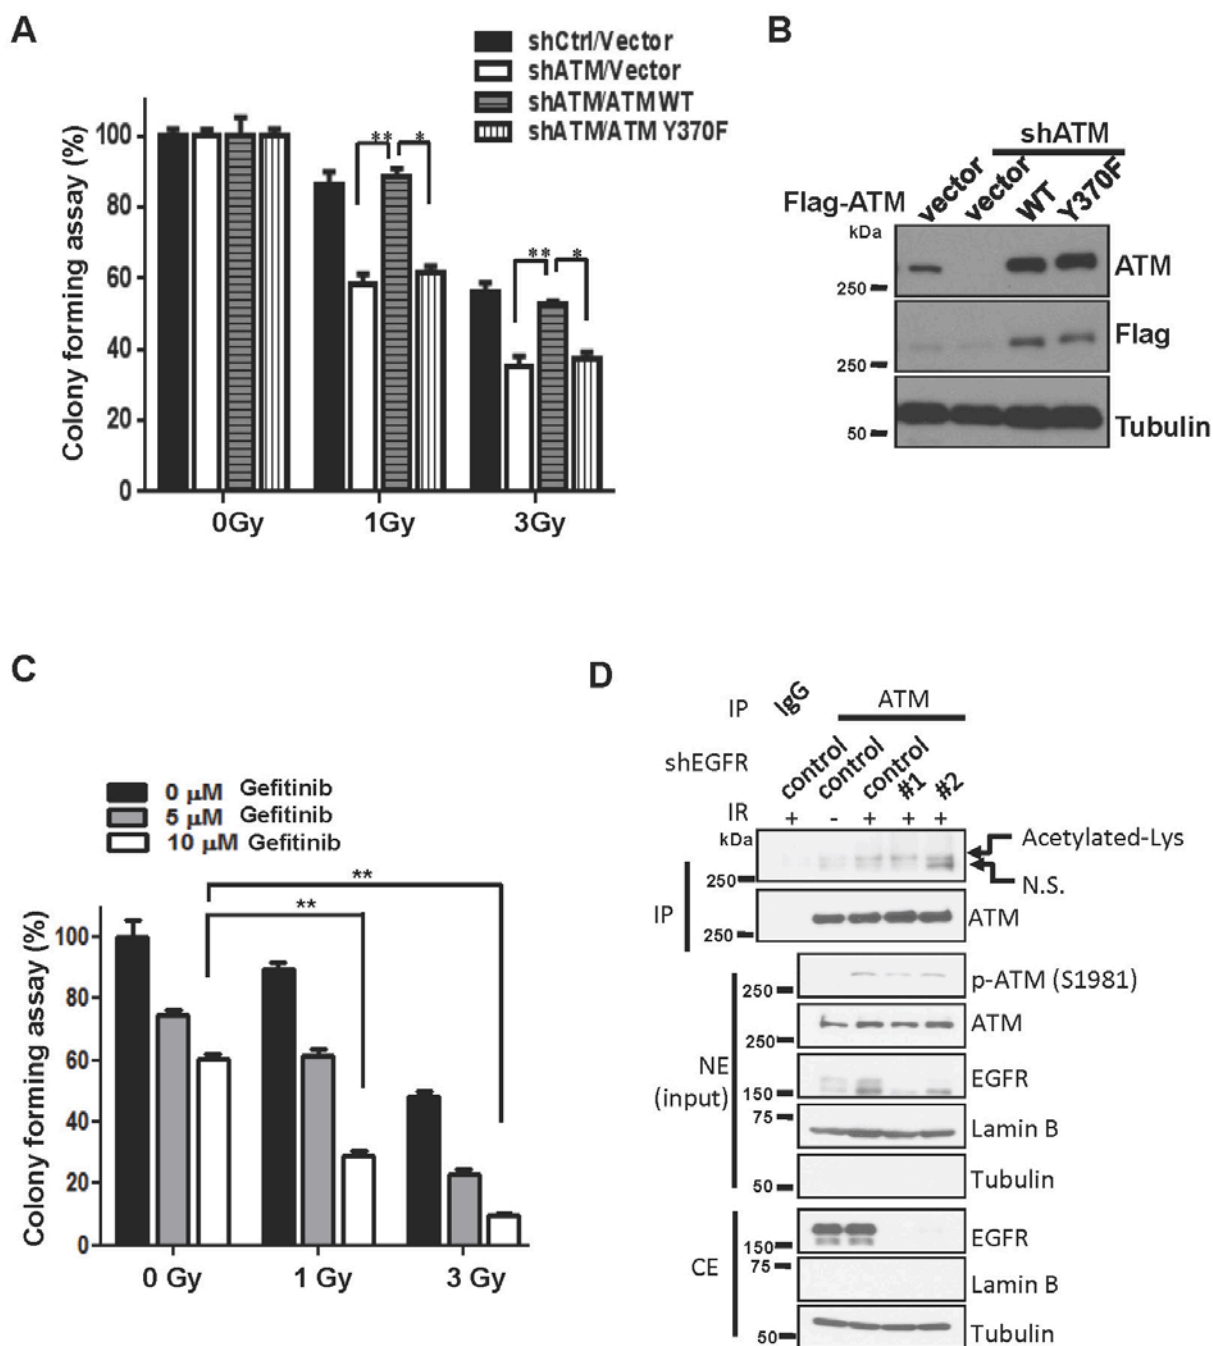

**Supplementary information, Figure S5. ATM Y370 phosphorylation regulates radio-sensitivity.** (A) ATM-depleted HeLa cells were reconstituted with vector control, Flag-tagged ATM WT, or Y370F and treated with increasing doses of IR. The cell survival rate was determined by colony formation assay and presented as mean value  $\pm$ SD.  $n = 3$ . \* $p < 0.05$ . \*\* $p <$

0.01. **(B)** Western blot analysis of ATM-depleted HeLa cells with restoration of vector control, Flag-tagged ATM WT or Y370F. **(C)** Colony-forming assay of HeLa cells treated with the indicated concentration of gefitinib with increasing doses of IR. The cell survival rate was presented as mean value  $\pm$ SD.  $n = 3$ .  $**p < 0.01$ . **(D)** Nuclear fractionation of control or EGFR-knockdown HeLa cells stimulated with or without 10 Gy IR. Control: shRNA vector control. #1 and #2 indicate two different clones of shEGFR. The resulting nuclear extracts (NE) were harvested for immunoprecipitation (IP) assays with anti-ATM antibody, followed by Western blotting with the indicated antibodies. Acetylated-Lys: anti-acetylation antibody. N.S.: non-specific signal.
