# Supplementary material
Source: PubMed Central journal article supplement (PMC4650576)
Supplement: cr20158x6.pdf [file cr20158x6.pdf]

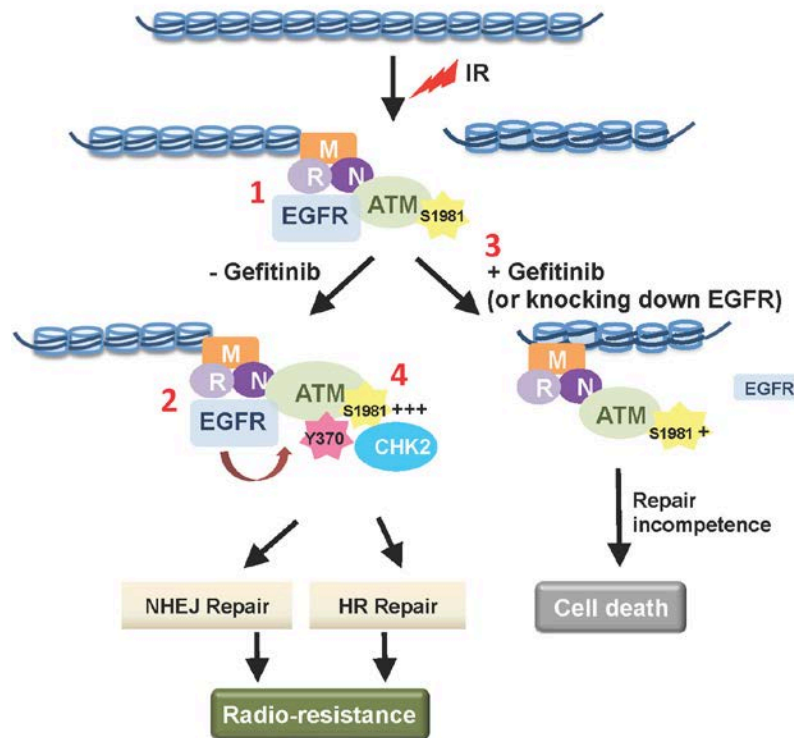

**Supplementary information, Figure S6.** Proposed model showing the role of EGFR in ATM-mediated DNA damage response. ATM associates with and is phosphorylated at tyrosine 370 (Y370) by nuclear epidermal growth factor receptor (EGFR) upon IR stimulation (1); ATM then co-localizes with EGFR at DSBs (2); Knocking down EGFR or addition of EGFR kinase inhibitor gefitinib impairs ATM and downstream CHK2 foci formation and reduces DNA repair efficiency (3); EGFR-mediated ATM Y370 phosphorylation facilitates ATM and CHK2 foci formation, and NBS1 phosphorylation, and enhances radiotherapy resistance (4).
